# Supplementary material
Source: PubMed Central journal article supplement (PMC1224692)

### Microarray data verification

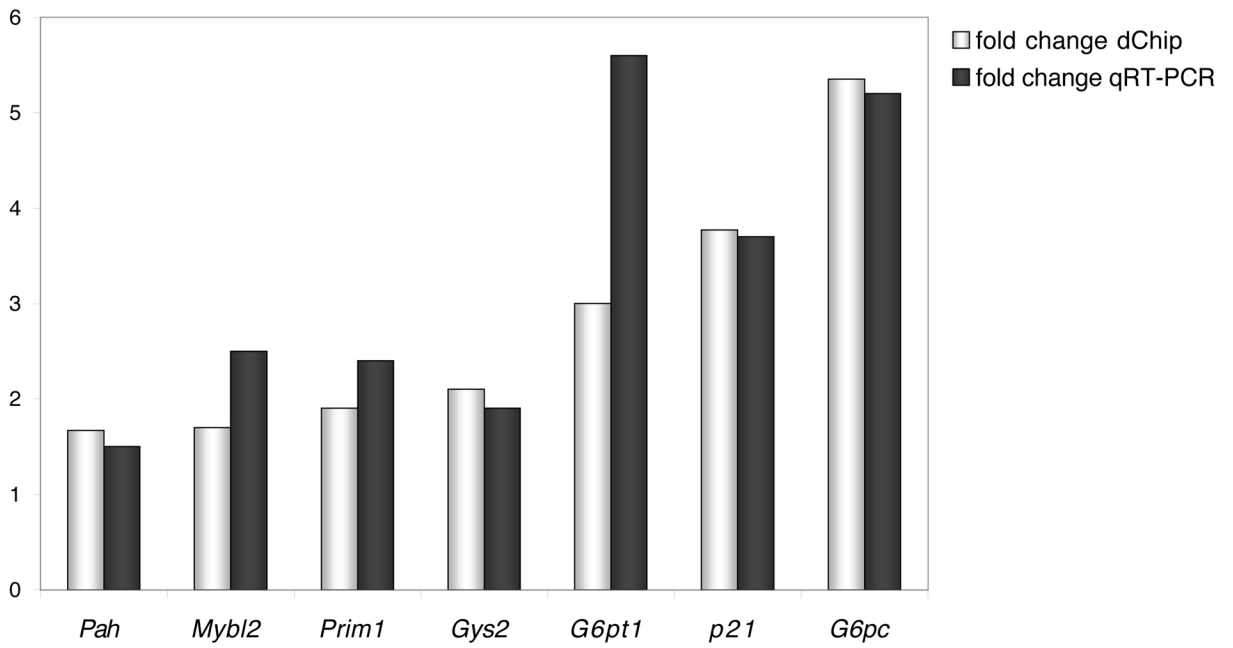

Supplementary Figure 1.

Supplement: 7600802s6.pdf [file 7600802s6.pdf]
